# Supplementary material for: Evaluation of the BioFire® FilmArray® Pneumonia Panel with Conventional Bacterial Culture in Conjunction with Leukocyte Esterase Test
Source: MDPI journal article supplement (doi:10.3390/diagnostics13111847), 2023-05-25
Supplement: s1 [file s1]

**Table S1. Primer information for conventional PCR**

| Targets                       | Sequence of primer (5' → 3')                              | PCR product size | References |
|-------------------------------|-----------------------------------------------------------|------------------|------------|
| <i>K. pneumoniae</i>          | ATT TCT CCG GCG TCA AGT GT<br>CTC AAC ATC GTC GCA AAG GC  | 202              | [19]       |
| <i>S. aureus</i>              | CGC AAA CTG TTG GCC ACT AT<br>CTC GCC ATC ATG ATT CAA GT  | 293              |            |
| <i>S. pneumoniae</i>          | TTG ACC CAT CAG GGA GAA AG<br>CTT GAT GCC ACT TAG CCA AC  | 349              |            |
| <i>P. aeruginosa</i>          | GAT GGA AAT GCT GAA ATT CG<br>GGA CGC TCT TTA CCA TAG GA  | 444              |            |
| <i>H. influenzae</i>          | GCG AAA GTC CAA GCC TCT CT<br>TCA CCG TAA GAT ACT GTG CCT | 582              |            |
| <i>Legionella</i> spp.        | GGCGACCTGGCTTC<br>GGTCATCGTTTGCATTATATTTA                 | 101              | [20]       |
| <i>Legionella pneumophila</i> | GGCCAATAGGTCCGCCAACG<br>GGTGACTGCGGCTGTTATGG              | 632              | [21]       |

**Table S2. Conventional culture results according to the leukocyte esterase grade and sputum quality.**

| Urine strip grade for leukocyte esterase | Sputum quality (adequate) (n = 39) |                          | Sputum quality (inadequate) (n = 28) |                          |
|------------------------------------------|------------------------------------|--------------------------|--------------------------------------|--------------------------|
|                                          | Conventional culture (+)           | Conventional culture (-) | Conventional culture (+)             | Conventional culture (-) |
| Negative (n = 21)                        | 1                                  | 7                        | 1                                    | 12                       |
| Positive (1+, 2+, 3+)<br>(n = 45)        | 14                                 | 17                       | 9                                    | 5                        |
| Mucoid (n = 1)                           | 0                                  | 0                        | 0                                    | 1                        |
| Total                                    | 15                                 | 24                       | 10                                   | 18                       |
